# Supplementary material for: Application of A Novel Potential Probiotic Lactobacillus paracasei Strain Isolated from Kefir Grains in the Production of Feta-Type Cheese
Source: MDPI journal article supplement (doi:10.3390/microorganisms6040121), 2018-11-29
Supplement: s1 [file s1]

**Table S1.** Blast analysis of the partial 16S rRNA gene sequence of *Lactobacillus* SP3.

| <i>Lactobacillus</i> strain                     | Identity | Accession number |
|-------------------------------------------------|----------|------------------|
| <i>Lactobacillus paracasei</i> strain LL13      | 99%      | KX951732.1       |
| <i>Lactobacillus paracasei</i> strain RCM2      | 99%      | KT626389.1       |
| <i>Lactobacillus casei</i> strain ZT-Lca.62     | 99%      | KM921936.1       |
| <i>Lactobacillus casei</i> strain ZT-Lca.65     | 99%      | KM921935.1       |
| <i>Lactobacillus casei</i> strain OC6           | 99%      | JN851813.1       |
| <i>Lactobacillus paracasei</i> strain CACIO12CT | 99%      | KU315107.1       |
| <i>Lactobacillus paracasei</i> strain CB8CT     | 99%      | KU315101.1       |
| <i>Lactobacillus paracasei</i> strain UP2F      | 99%      | MK071312.1       |
| <i>Lactobacillus paracasei</i> strain MA10-5    | 99%      | MG755370.1       |
| <i>Lactobacillus casei</i> strain L25           | 99%      | MH094125.1       |
| <i>Lactobacillus casei</i> strain L20           | 99%      | MH094124.1       |
| <i>Lactobacillus casei</i> strain 111           | 99%      | MH997808.1       |
| <i>Lactobacillus casei</i> strain ACP01         | 99%      | MK032218.1       |
| <i>Lactobacillus casei</i> strain P5-1          | 99%      | MK024231.1       |
| <i>Lactobacillus paracasei</i> strain 4G330     | 99%      | MK026811.1       |
